# Supplementary material for: Naringenin and Phytoestrogen 8-Prenylnaringenin Protect against Islet Dysfunction and Inhibit Apoptotic Signaling in Insulin-Deficient Diabetic Mice
Source: MDPI journal article supplement (doi:10.3390/molecules27134227), 2022-06-30
Supplement: s1 [file s1]

## Article

# Naringenin and Phytoestrogen 8-Prenylnaringenin Protect against Islet Dysfunction and Inhibit Apoptotic Signaling in Insulin-Deficient Diabetic Mice

Song Park <sup>1</sup>, Kyu Sang Sim <sup>2</sup>, Yeop Hwangbo <sup>1</sup>, Sung Jin Park <sup>3</sup>, Young Jun Kim <sup>3</sup> and Jun Ho Kim <sup>1,\*</sup>

<sup>1</sup> Department of Food Science and Biotechnology, Andong National University, Andong 36729, Korea; andongori@naver.com (S.P.); qhduq97@naver.com (Y.H.)

<sup>2</sup> Biomaterials Research Institute, Kyochon F&B, Andong 36729, Korea; sim9612@naver.com

<sup>3</sup> Department of Food and Biotechnology, Korea University, Sejong 30019, Korea; timothyjs@hanmail.net (S.J.P.); yk46@korea.ac.kr (Y.J.K.)

\* Correspondence: jhkim@anu.ac.kr; Tel.: +82-54-820-5846; Fax: +82-54-820-6264

**Table S1.** Antibodies used for western blotting.

| Primary antibody | Clone      | Company        | Catalog No. | Dilution |
|------------------|------------|----------------|-------------|----------|
| p65              | Polyclonal | Thermo Fisher  | PA5-27617   | 1:1000   |
| p-p65            | Polyclonal | ABcam          | ab86299     | 1:2000   |
| p-p53            | Polyclonal | ABcam          | ab1431      | 1:1000   |
| p38              | Polyclonal | Cell Signaling | #9212       | 1:1000   |
| p-p38            | Polyclonal | ABcam          | ab47363     | 1:2000   |
| JNK              | Monoclonal | ABcam          | ab179461    | 1:2000   |
| p-JNK            | Monoclonal | ABcam          | ab124956    | 1:2000   |
| ERK              | Polyclonal | ABcam          | ab17942     | 1:2000   |
| p-ERK            | Monoclonal | ABcam          | ab201015    | 1:2000   |
| p-p53            | Polyclonal | ABcam          | ab1431      | 1:1000   |
| PI3K             | Monoclonal | Thermo Fisher  | MA1-74183   | 1:1000   |
| p-PI3K           | Polyclonal | Thermo Fisher  | PA5-104853  | 1:1000   |
| AKT              | Polyclonal | Cell Signaling | #9272       | 1:1000   |
| p-AKT            | Polyclonal | Cell Signaling | #9271       | 1:1000   |
| BAX              | Monoclonal | Cell Signaling | #2772       | 1:1000   |
| Bcl2             | Monoclonal | ABcam          | ab692       | 1:500    |
| c-Cas3           | Polyclonal | Cell Signaling | #9661       | 1:1000   |
| c-Cas8           | Monoclonal | Cell Signaling | #8592       | 1:1000   |
| c-Cas9           | Polyclonal | Cell Signaling | #9509       | 1:1000   |
| c-PARP           | Monoclonal | ABcam          | ab32064     | 1:1000   |
| TNF- $\alpha$    | Polyclonal | ABcam          | ab6671      | 1:2000   |
| IL-1 $\beta$     | Polyclonal | Santa Cruz     | sc-7884     | 1:1000   |
| ER $\alpha$      | Monoclonal | Thermo Fisher  | MA1-80216   | 1:1000   |
| ER $\beta$       | Polyclonal | Thermo Fisher  | PA1-310B    | 1:1000   |
| FGF21            | Monoclonal | Thermo Fisher  | MA5-32652   | 1:1000   |
| GAPDH            | Monoclonal | Abbkine        | A01020-SK   | 1:2000   |
